# Supplementary material for: Culturable Diversity of Lichen-Associated Yeasts through Enrichment Strategies
Source: MDPI journal article supplement (doi:10.3390/ecologies4010012), 2023-03-02
Supplement: s1 [file s1]

Archive with 4 entries (4 files):
- Figure S1.pdf
- Figure S2.pdf
- Table S1.pdf
- Table S2.pdf
