# Supplementary material for: Culturable Diversity of Lichen-Associated Yeasts through Enrichment Strategies
Source: MDPI journal article supplement (doi:10.3390/ecologies4010012), 2023-03-02
Supplement: s1 [file s1 › Figure S1.pdf]

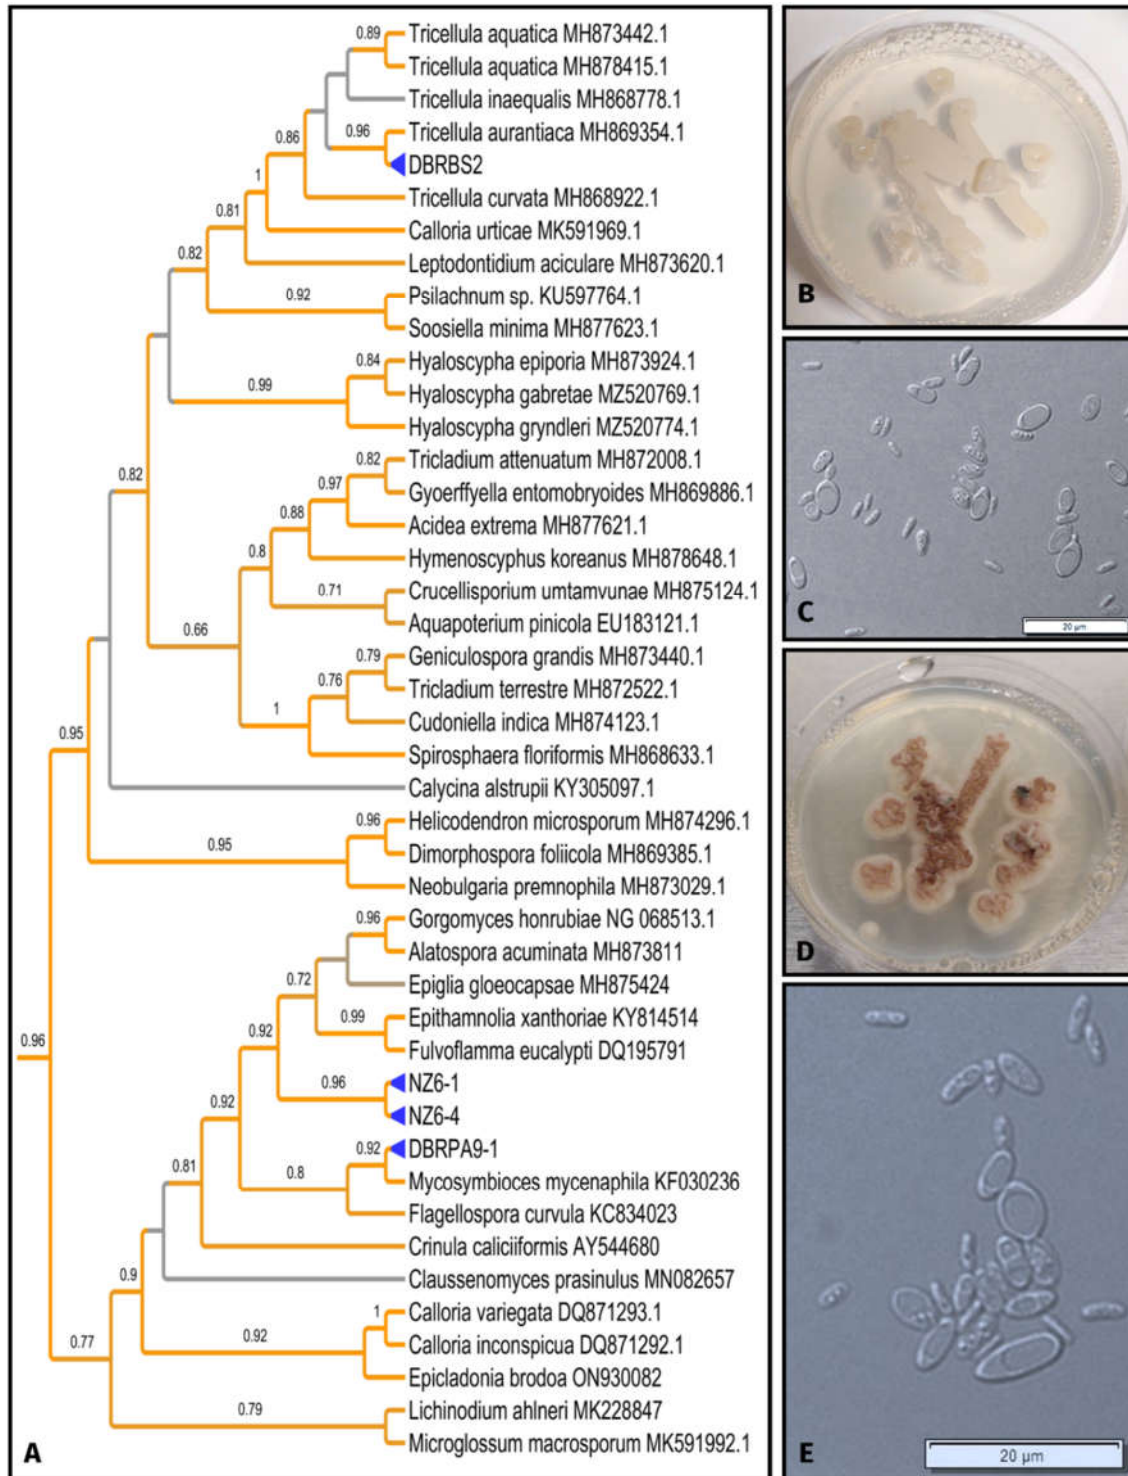

**Figure S1.** Unknown yeast and yeast-like lichen-associated isolates from the Ascomycota class Leotiomyces: (A) Phylogram constructed from LSU alignment, GBLOCK analysis, and PhyML tree construction. Visualization constructed using TreeGraph2. Orange branches have greater than 50% support, grey branches lack support. Blue triangles represent isolates obtained via liquid enrichment strategies; (B) Culture morphology of isolate DBRBS2-1; (C) Yeast cells of isolate DBRBS2-1 (1000 X); (D) Culture morphology of isolated DBRPA9-1; (E) Yeast cells of isolate DBRPA9-1 (1000 X).
