# Supplementary material for: Culturable Diversity of Lichen-Associated Yeasts through Enrichment Strategies
Source: MDPI journal article supplement (doi:10.3390/ecologies4010012), 2023-03-02
Supplement: s1 [file s1 › Figure S2.pdf]

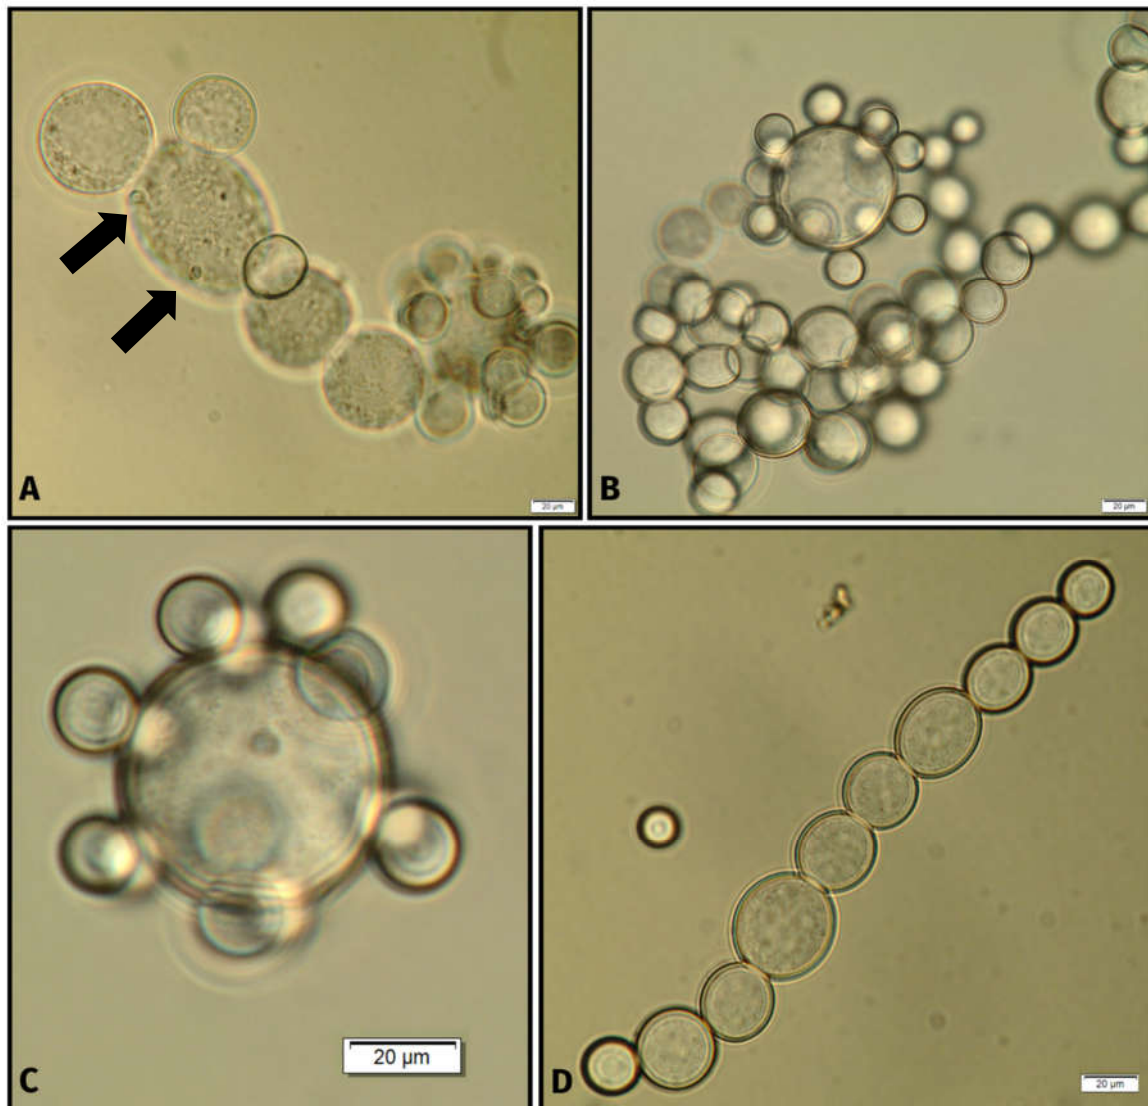

**Figure S2.** Dimorphic Mucur isolate obtained from liquid enrichment strategies. (A-C) Spherical multipolar budding yeasts cells.; (D) Yeast chain. Note the large size and numerous budding daughter cells. Arrows indicate newly forming budding locations. All images obtained at 1000 X.
