# Supplementary material for: Culturable Diversity of Lichen-Associated Yeasts through Enrichment Strategies
Source: MDPI journal article supplement (doi:10.3390/ecologies4010012), 2023-03-02
Supplement: s1 [file s1 › Table S1.pdf]

Table S1. Fungal species acquired from NCBI GenBank used for phylogenetic placement.

| Fungal Class    | Species                          | GenBank Acc # |
|-----------------|----------------------------------|---------------|
| Dothideomycetes | <i>Aureobasidium leucospermi</i> | MH877257      |
|                 | <i>Aureobasidium lini</i>        | MH866211      |
|                 | <i>Aureobasidium melanogenum</i> | MH866219      |
|                 | <i>Aureobasidium pullulans</i>   | MH869192      |
|                 | <i>Aureobasidium subglaciale</i> | MH874818      |
|                 | <i>Conidiocarpus betle</i>       | MN749221      |
|                 | <i>Delphinella strobiligena</i>  | DQ470977      |
|                 | <i>Delphinella strobiligena</i>  | MH872074      |
|                 | <i>Dothichiza</i> sp.            | MH858601      |
|                 | <i>Dothiora aloidendri</i>       | MW175387      |
|                 | <i>Dothiora cannabinae</i>       | MH872076      |
|                 | <i>Dothiora ceratoniae</i>       | MH872233      |
|                 | <i>Dothiora elliptica</i>        | MH872075      |
|                 | <i>Dothiora europaea</i>         | MH872077      |
|                 | <i>Dothiora europaea</i>         | MH872143      |
|                 | <i>Dothiora laureolae</i>        | MH872081      |
|                 | <i>Dothiora maculans</i>         | MH872751      |
|                 | <i>Dothiora oleae</i>            | MH872293      |
|                 | <i>Dothiora omaniana</i>         | MT077209      |
|                 | <i>Dothiora phaeosperma</i>      | MH872134      |
|                 | <i>Dothiora phillyreae</i>       | MH871117      |
|                 | <i>Dothiora prunorum</i>         | MH872324      |
|                 | <i>Dothiora prunorum</i>         | MH878472      |
|                 | <i>Dothiora rhamni-alpinae</i>   | MH872082      |
|                 | <i>Dothiora ribesia</i>          | AY779297      |
|                 | <i>Dothiora schizospora</i>      | MH868980      |
|                 | <i>Dothiora sorbi</i>            | MH872080      |
|                 | <i>Elsinoe banksiicola</i>       | MH874507      |
|                 | <i>Elsinoe flacourtiae</i>       | MH869815      |
|                 | <i>Elsinoe ichtocarpus</i>       | MH869816      |
|                 | <i>Elsinoe</i> sp.               | OM333564      |
|                 | <i>Hormonema macrosporum</i>     | MH874128      |
|                 | <i>Hormonema merioides</i>       | MH873614      |
|                 | <i>Hormonema schizolunatum</i>   | MH874183      |
|                 | <i>Hormonema viticola</i>        | MH878164      |
|                 | <i>Hortaea acidophila</i>        | GU323202      |
|                 | <i>Hortaea werneckii</i>         | MH872799      |
|                 | <i>Kabatina mahoniae</i>         | MH874022      |
|                 | <i>Leptoxylum</i> sp.            | MN749208      |
|                 | <i>Mendoglia yunnanensis</i>     | MK433593      |
|                 | <i>Metasphaeria</i> sp.          | KF590163      |

|                    |                                     |          |
|--------------------|-------------------------------------|----------|
|                    | <i>Myriangium haraeum</i>           | MH867034 |
|                    | <i>Neoasbolisia phylicae</i>        | MN749215 |
|                    | <i>Neodothiora populina</i>         | MW175405 |
|                    | <i>Phaeoxyphiella australiana</i>   | MN749220 |
|                    | <i>Plowrightia abietis</i>          | EF114703 |
|                    | <i>Plowrightia periclymeni</i>      | FJ215702 |
|                    | <i>Pringsheimia chamaecyparidis</i> | MH872083 |
|                    | <i>Pringsheimia euphorbiae</i>      | MH872084 |
|                    | <i>Pringsheimia</i> sp.             | MW791963 |
|                    | <i>Pseudoseptoria donacis</i>       | MH877798 |
|                    | <i>Sacothecium rubi</i>             | NG_59644 |
|                    | <i>Sacothecium sepincola</i>        | GU301870 |
|                    | <i>Sclerophoma eustomatis</i>       | MH867090 |
|                    | <i>Scolecocyphium phylicae</i>      | MN749227 |
|                    | <i>Scorias leucadendri</i>          | MN749229 |
|                    | <i>Sydowia polyspora</i>            | MH872085 |
| <b>Leotiomyces</b> | <i>Acidea extrema</i>               | MH877621 |
|                    | <i>Alatospora acuminata</i>         | MH873811 |
|                    | <i>Aquapoterium pinicola</i>        | EU183121 |
|                    | <i>Calloria inconspicua</i>         | DQ871292 |
|                    | <i>Calloria urticae</i>             | MK591969 |
|                    | <i>Calloria variegata</i>           | DQ871293 |
|                    | <i>Calycina alstrupii</i>           | KY305097 |
|                    | <i>Claussenomyces prasinulus</i>    | MN082657 |
|                    | <i>Crinula caliciiformis</i>        | AY544680 |
|                    | <i>Crucellisporium umtamvunae</i>   | MH875124 |
|                    | <i>Cudoniella indica</i>            | MH874123 |
|                    | <i>Dimorphospora foliicola</i>      | MH869385 |
|                    | <i>Epicladonia brodoa</i>           | ON930082 |
|                    | <i>Epiglia gloeocapsae</i>          | MH875424 |
|                    | <i>Epithamnolia xanthoriae</i>      | KY814514 |
|                    | <i>Flagellospora curvula</i>        | KC834023 |
|                    | <i>Fulvoflamma eucalypti</i>        | DQ195791 |
|                    | <i>Geniculospora grandis</i>        | MH873440 |
|                    | <i>Gorgomyces honrubiae</i>         | NG_68513 |
|                    | <i>Gyoerffyella entomobryoides</i>  | MH869886 |
|                    | <i>Helicodendron microsporum</i>    | MH874296 |
|                    | <i>Hyaloscypha epiporia</i>         | MH873924 |
|                    | <i>Hyaloscypha gabretae</i>         | MZ520769 |
|                    | <i>Hyaloscypha gryndleri</i>        | MZ520774 |
|                    | <i>Hymenoscyphus koreanus</i>       | MH878648 |
|                    | <i>Leptodontidium aciculare</i>     | MH873620 |
|                    | <i>Lichinodium ahlneri</i>          | MK228847 |
|                    | <i>Microglossum macrosporum</i>     | MK591992 |

|                    |                                       |          |
|--------------------|---------------------------------------|----------|
|                    | <i>Mycosymbioces mycenaphila</i>      | KF030236 |
|                    | <i>Neobulgaria premnophila</i>        | MH873029 |
|                    | <i>Psilachnum</i> sp.                 | KU597764 |
|                    | <i>Soosiella minima</i>               | MH877623 |
|                    | <i>Spirosphaera floriformis</i>       | MH868633 |
|                    | <i>Tricellula aquatica</i>            | MH873442 |
|                    | <i>Tricellula aquatica</i>            | MH878415 |
|                    | <i>Tricellula aurantiaca</i>          | MH869354 |
|                    | <i>Tricellula curvata</i>             | MH868922 |
|                    | <i>Tricellula inaequalis</i>          | MH868778 |
|                    | <i>Tricladium attenuatum</i>          | MH872008 |
|                    | <i>Tricladium terrestre</i>           | MH872522 |
| Microbotryomycetes | <i>Aurantiosporium scleriae</i>       | MT636661 |
|                    | <i>Ballistosporomyces taupoensis</i>  | KY106153 |
|                    | <i>Ballistosporomyces xanthus</i>     | KY106152 |
|                    | <i>Bannozya yamatoana</i>             | KY106161 |
|                    | <i>Bauerago abstrusa</i>              | EF621955 |
|                    | <i>Bauerago vuyckii</i>               | MT636660 |
|                    | <i>Camptobasidium arcticum</i>        | MK454828 |
|                    | <i>Camptobasidium gelus</i>           | MK670503 |
|                    | <i>Chrysozyma griseoflava</i>         | KY106920 |
|                    | <i>Colacogloea cycloclastica</i>      | AF444732 |
|                    | <i>Colacogloea diffluens</i>          | KY106940 |
|                    | <i>Colacogloea effusa</i>             | MW293727 |
|                    | <i>Colacogloea eucalyptica</i>        | KY106941 |
|                    | <i>Colacogloea falcata</i>            | KY106942 |
|                    | <i>Colacogloea foliorum</i>           | KY106943 |
|                    | <i>Colacogloea philyla</i>            | KY106946 |
|                    | <i>Colacogloea retinophila</i>        | KY106947 |
|                    | <i>Colacogloea terpenoidalis</i>      | KY106948 |
|                    | <i>Cryolevonia giraudoe</i>           | MN626546 |
|                    | <i>Curvibasidium cygneicollum</i>     | KY107291 |
|                    | <i>Curvibasidium nothofagi</i>        | AF189950 |
|                    | <i>Fellozyma inositophila</i>         | KY107699 |
|                    | <i>Fulvisporium restifaciens</i>      | MT636663 |
|                    | <i>Glaciozyma antarctica</i>          | KY107752 |
|                    | <i>Glaciozyma martinii</i>            | KY107753 |
|                    | <i>Glaciozyma watsonii</i>            | KY107758 |
|                    | <i>Hamamotoa singularis</i>           | KY107777 |
|                    | <i>Heitmania castanopsis</i>          | KY450666 |
|                    | <i>Heitmania litseae</i>              | KY450665 |
|                    | <i>Heterogastridium pycnidioideum</i> | AY512851 |
|                    | <i>Hyalopycnis blepharistoma</i>      | AF189900 |
|                    | <i>Kalmanago commelinae</i>           | MT636655 |

|                                          |           |
|------------------------------------------|-----------|
| <i>Kriegeria eriophori</i>               | KY108178  |
| <i>Leucosporidium fragarium</i>          | KY108279  |
| <i>Leucosporidium golubevii</i>          | KY108283  |
| <i>Leucosporidium intermedium</i>        | KY108446  |
| <i>Leucosporidium muscorum</i>           | KY108280  |
| <i>Leucosporidium scottii</i>            | KY108286  |
| <i>Leucosporidium yakuticum</i>          | KY108281  |
| <i>Libkindia masarykiana</i>             | NG_060337 |
| <i>Liroa emodensis</i>                   | AY512858  |
| <i>Meredithblackwellia eburnea</i>       | KY108448  |
| <i>Microbotryozyma collariae</i>         | OK582236  |
| <i>Microbotryum pinguiculae</i>          | MH867612  |
| <i>Oberwinklerozyma yarrowii</i>         | KY108666  |
| <i>Phenoliferia</i> sp.                  | MW663850  |
| <i>Pseudohyphozyma pustula</i>           | KY108952  |
| <i>Pseudoleucosporidium fasciculatum</i> | KY108282  |
| <i>Psychromyces glacialis</i>            | MT301950  |
| <i>Reniforma strues</i>                  | AF189912  |
| <i>Rhodosporidiobolus nylandii</i>       | KY108966  |
| <i>Rhodosporidiobolus poonsookiae</i>    | KY108972  |
| <i>Rhodosporidium toruloides</i>         | KP196361  |
| <i>Rhodotorula glutinis</i>              | KY109042  |
| <i>Rhodotorula mucilaginosa</i>          | KY109140  |
| <i>Rhodotorula sphaerocarpa</i>          | KY109155  |
| <i>Rhodotorula taiwanensis</i>           | KY109163  |
| <i>Rosettozyma</i> sp.                   | OL853574  |
| <i>Sampaiozyma vanillica</i>             | KY109537  |
| <i>Slooffia tsugae</i>                   | KY109661  |
| <i>Spenceromyza</i> sp.                  | MK131326  |
| <i>Spenceromyza</i> sp.                  | ON806948  |
| <i>Sphacelotheca destruens</i>           | ON729311  |
| <i>Sphacelotheca hydropiperis</i>        | MH866298  |
| <i>Sporidiobolus metaroseus</i>          | KY109696  |
| <i>Sporidiobolus salmonicolor</i>        | KY109726  |
| <i>Sporobolomyces johnsonii</i>          | MH868261  |
| <i>Sporobolomyces musae</i>              | OK483137  |
| <i>Sporobolomyces phaffii</i>            | KY109760  |
| <i>Sporobolomyces roseus</i>             | KY109761  |
| <i>Sporobolomyces salmoneus</i>          | KY109767  |
| <i>Trigonosporomyces hylophilus</i>      | MH873232  |
| <i>Udeniozyma ferulica</i>               | KY110016  |
| <i>Ustilentyloma graminis</i>            | KY109998  |
| <i>Vonarxula javanica</i>                | KY110052  |
| <i>Yamadamyces rosulatus</i>             | KY110152  |
| <i>Yamadamyces terricola</i>             | MK050425  |

|                 |                                          |           |
|-----------------|------------------------------------------|-----------|
|                 | <i>Yunzhangia</i> sp.                    | MK265708  |
|                 | <i>Yurkovia mendeliana</i>               | KU187888  |
|                 | <i>Zymoxenogloea eriophori</i>           | L20288    |
| Tremellomycetes | <i>Apiotrichum lignicola</i>             | MH866984  |
|                 | <i>Apiotrichum wieringae</i>             | KY109964  |
|                 | <i>Bandonia marina</i>                   | NG_058617 |
|                 | <i>Biatoropsis millanesiana</i>          | MN973663  |
|                 | <i>Bullera alba</i>                      | KY106261  |
|                 | <i>Bullera alba</i>                      | KY106260  |
|                 | <i>Bulleribasidium begoniae</i>          | KY106249  |
|                 | <i>Bulleribasidium panici</i>            | KY106254  |
|                 | <i>Carcinomyces arundinariae</i>         | KY106919  |
|                 | <i>Carlosrosaea hohenbergiae</i>         | MH909028  |
|                 | <i>Carlosrosaea hohenbergiae</i>         | MT444985  |
|                 | <i>Carlosrosaea</i> sp.                  | MH909056  |
|                 | <i>Cryptococcus amylolentus</i>          | KY106966  |
|                 | <i>Cryptococcus gattii</i>               | KY107286  |
|                 | <i>Cryptotrichosporon anacardii</i>      | AY550002  |
|                 | <i>Cutaneotrichosporon mucoides</i>      | KY107339  |
|                 | <i>Cutaneotrichosporon terricola</i>     | KY107346  |
|                 | <i>Cystofilobasidium bisporidii</i>      | KY107449  |
|                 | <i>Cystofilobasidium capitatum</i>       | KY107453  |
|                 | <i>Cystofilobasidium ferigula</i>        | KY107454  |
|                 | <i>Cystofilobasidium infirmominiatum</i> | KY107467  |
|                 | <i>Cystofilobasidium lacus-mascardii</i> | KY107469  |
|                 | <i>Cystofilobasidium macerans</i>        | KY107476  |
|                 | <i>Derxomyces amylogenes</i>             | KY107616  |
|                 | <i>Derxomyces cylindricus</i>            | KY107619  |
|                 | <i>Derxomyces mrakii</i>                 | KY107621  |
|                 | <i>Derxomyces nakasei</i>                | KY107623  |
|                 | <i>Derxomyces pseudohuiaensis</i>        | KY107624  |
|                 | <i>Derxomyces pseudoschimicola</i>       | KY107625  |
|                 | <i>Derxomyces schimicola</i>             | KY107626  |
|                 | <i>Derxomyces wuzhishanensis</i>         | KY107628  |
|                 | <i>Dimennazyma cisti-albidi</i>          | KY107630  |
|                 | <i>Dioszegia aurantiaca</i>              | KY107635  |
|                 | <i>Dioszegia catarinonii</i>             | KY107638  |
|                 | <i>Dioszegia hungarica</i>               | KY107643  |
|                 | <i>Dioszegia rishiriensis</i>            | KY107648  |
|                 | <i>Dioszegia zsoltii</i>                 | KY107651  |
|                 | <i>Effuseotrichosporon vanderwaltii</i>  | KY107670  |
|                 | <i>Fellomyces horovitzi</i>              | KY107695  |
|                 | <i>Fellomyces penicillatus</i>           | KY107696  |
|                 | <i>Fellomyces polyborus</i>              | KY107698  |

|                                       |           |
|---------------------------------------|-----------|
| <i>Fibulobasidium inconspicuum</i>    | NG_057677 |
| <i>Filobasidium magnum</i>            | KY107722  |
| <i>Filobasidium uniguttulatum</i>     | KY107727  |
| <i>Filobasidium wieringae</i>         | KY107733  |
| <i>Fonsecazyma mujuensis</i>          | KY107735  |
| <i>Genolevuria armeniaca</i>          | KY107745  |
| <i>Genolevuria bromeliarum</i>        | KY107746  |
| <i>Goffeauzyma aciditolerans</i>      | KY107763  |
| <i>Goffeauzyma gastrica</i>           | KY107764  |
| <i>Goffeauzyma metallitolerans</i>    | KY107771  |
| <i>Haglerozyma chiarellii</i>         | KY107775  |
| <i>Hannaella sinensis</i>             | KY107789  |
| <i>Hannaella surugaensis</i>          | KY107792  |
| <i>Hannaella xanthorrhoeae</i>        | ON819426  |
| <i>Hannaella zeae</i>                 | KY107793  |
| <i>Heterocephalacria bachmannii</i>   | MG553342  |
| <i>Holtermannia corniformis</i>       | KY107870  |
| <i>Holtermanniella wattica</i>        | KY107874  |
| <i>Hyalodendron oudemansiellicola</i> | MH874042  |
| <i>Itersonilia pannonica</i>          | KY107894  |
| <i>Itersonilia perplexans</i>         | MH873579  |
| <i>Kockovaella barringtoniae</i>      | KY108115  |
| <i>Kockovaella chinensis</i>          | KY108117  |
| <i>Kockovaella fuzhouensis</i>        | KY108119  |
| <i>Kockovaella lichenicola</i>        | KY108122  |
| <i>Kockovaella mexicana</i>           | KY108124  |
| <i>Kockovaella phaffii</i>            | KY108125  |
| <i>Kockovaella prillingeri</i>        | KY108126  |
| <i>Kockovaella sacchari</i>           | KY108127  |
| <i>Kockovaella sichuanensis</i>       | KY108129  |
| <i>Krasilnikovozyma huempii</i>       | KY108167  |
| <i>Kwoniella bestiolae</i>            | KY108196  |
| <i>Kwoniella dendrophila</i>          | KY108198  |
| <i>Kwoniella heveanensis</i>          | KY108201  |
| <i>Kwoniella mangrovensis</i>         | KY108202  |
| <i>Mrakia frigida</i>                 | KY108579  |
| <i>Mrakia gelida</i>                  | KY108585  |
| <i>Naematelia aurantialba</i>         | MN744666  |
| <i>Naematelia encephala</i>           | MW520433  |
| <i>Naganishia globosa</i>             | KY108616  |
| <i>Nielozyma formosana</i>            | KY108665  |
| <i>Papiliotrema anemochoreius</i>     | KY108727  |
| <i>Papiliotrema aurea</i>             | KY108728  |
| <i>Papiliotrema laurentii</i>         | KY108739  |
| <i>Papiliotrema mangalensis</i>       | KY107130  |

|                                        |           |
|----------------------------------------|-----------|
| <i>Papiliotrema pseudoalba</i>         | KY106243  |
| <i>Papiliotrema pseudoalba</i>         | KY106244  |
| <i>Papiliotrema terrestris</i>         | KY108747  |
| <i>Phaeotremella pseudofoliacea</i>    | KY108760  |
| <i>Phaffia rhodozyma</i>               | KY108766  |
| <i>Piskurozyma cylindrica</i>          | KY108932  |
| <i>Piskurozyma taiwanensis</i>         | KY108934  |
| <i>Pseudotremella moriformis</i>       | KY108955  |
| <i>Rhynchogastrema aquatica</i>        | KY109179  |
| <i>Rhynchogastrema fermentans</i>      | KY109181  |
| <i>Rhynchogastrema glucofermentans</i> | KY109182  |
| <i>Saitozyma podzolica</i>             | KY107257  |
| <i>Saitozyma wallum</i>                | MH793355  |
| <i>Sirobasidium magnum</i>             | KY109657  |
| <i>Solicoccozyma aerea</i>             | KY109666  |
| <i>Solicoccozyma terricola</i>         | KY109683  |
| <i>Sterigmatosporidium polymorphum</i> | KY109796  |
| <i>Sugitazyma miyagiana</i>            | KY109797  |
| <i>Takashimella koratensis</i>         | KY106240  |
| <i>Tausonia pullulans</i>              | EF551318  |
| <i>Tremella anaptychia</i>             | KY950300  |
| <i>Tremella aurantia</i>               | AF189842  |
| <i>Tremella aurantia</i>               | AF444315  |
| <i>Tremella aurantia</i>               | NG_057657 |
| <i>Tremella aurantia</i>               | NR_155873 |
| <i>Tremella australe</i>               | MT425188  |
| <i>Tremella australe</i>               | MT445848  |
| <i>Tremella brasiliensis</i>           | AF189864  |
| <i>Tremella brasiliensis</i>           | AF444429  |
| <i>Tremella brasiliensis</i>           | NG_042360 |
| <i>Tremella brasiliensis</i>           | NR_119454 |
| <i>Tremella celata</i>                 | KT334589  |
| <i>Tremella cerebriiformis</i>         | OK021569  |
| <i>Tremella cerebriiformis</i>         | OK021586  |
| <i>Tremella cinnabarina</i>            | AF189866  |
| <i>Tremella cinnabarina</i>            | AF444430  |
| <i>Tremella cinnabarina</i>            | KY109888  |
| <i>Tremella cinnabarina</i>            | NG_057662 |
| <i>Tremella coalescens</i>             | AF189865  |
| <i>Tremella coalescens</i>             | KY105678  |
| <i>Tremella coalescens</i>             | KY109889  |
| <i>Tremella endosporogena</i>          | KT334591  |
| <i>Tremella flava</i>                  | KY109891  |
| <i>Tremella flava</i>                  | MZ668721  |
| <i>Tremella flava</i>                  | OK021585  |

|          |                                    |          |
|----------|------------------------------------|----------|
|          | <i>Tremella fuciformis</i>         | AF444316 |
|          | <i>Tremella fuciformis</i>         | JN043571 |
|          | <i>Tremella fuciformis</i>         | KY105683 |
|          | <i>Tremella fuciformis</i>         | MZ057680 |
|          | <i>Tremella giraffa</i>            | AF042271 |
|          | <i>Tremella globispora</i>         | AF189869 |
|          | <i>Tremella globispora</i>         | AF444432 |
|          | <i>Tremella globispora</i>         | FJ534913 |
|          | <i>Tremella graphidis</i>          | KR058786 |
|          | <i>Tremella huuskonenii</i>        | KR857031 |
|          | <i>Tremella huuskonenii</i>        | KR857095 |
|          | <i>Tremella latispora</i>          | MT425192 |
|          | <i>Tremella mesenterica</i>        | AF042266 |
|          | <i>Tremella mesenterica</i>        | AF444433 |
|          | <i>Tremella mesenterica</i>        | FJ534914 |
|          | <i>Tremella mesenterica</i>        | KY105690 |
|          | <i>Tremella mesenterica</i>        | KY109900 |
|          | <i>Tremella pyrenulae</i>          | KR058789 |
|          | <i>Tremella subalpina</i>          | KR014100 |
|          | <i>Tremella tropica</i>            | KY109908 |
|          | <i>Tremella variaae</i>            | KT334599 |
|          | <i>Tremella wedinii</i>            | MN243150 |
|          | <i>Tremella yokohamensis</i>       | KY109910 |
|          | <i>Tremella zhejiangensis</i>      | MW624327 |
|          | <i>Tremella zhejiangensis</i>      | MW626836 |
|          | <i>Trichosporon infestans</i>      | MH370601 |
|          | <i>Trichosporon japonicum</i>      | KY109955 |
|          | <i>Trichosporon ovoides</i>        | KY109960 |
|          | <i>Trimorphomyces sakaeraticus</i> | MT756533 |
|          | <i>Udeniomyces megalosporus</i>    | KY109982 |
|          | <i>Vanrija humicola</i>            | KY110010 |
|          | <i>Vanrija longa</i>               | KY107129 |
|          | <i>Vishniacozyma carnescens</i>    | KY110023 |
|          | <i>Vishniacozyma dimennae</i>      | KY110025 |
|          | <i>Vishniacozyma heimaeyensis</i>  | KY110029 |
|          | <i>Vishniacozyma peneaus</i>       | KY110032 |
|          | <i>Vishniacozyma taibaiensis</i>   | KY110033 |
| outgroup | <i>Puccinia lagenophorae</i>       | FJ669236 |
| outgroup | <i>Puccinia obscura</i>            | FJ669234 |
