# Supplementary material for: Culturable Diversity of Lichen-Associated Yeasts through Enrichment Strategies
Source: MDPI journal article supplement (doi:10.3390/ecologies4010012), 2023-03-02
Supplement: s1 [file s1 › Table S2.pdf]

Table S2. Distribution of fungal isolates across sampled lichens.

| Sampled lichen species          | Basidiomycetes genera/species  | Ascomycetes genera/species          |
|---------------------------------|--------------------------------|-------------------------------------|
| <i>Aspicilia</i> sp.            |                                | <i>Leotiales</i>                    |
|                                 |                                | <i>Plowrightia</i>                  |
| <i>Buellia</i> sp.              |                                | <i>Aureobasidium</i>                |
|                                 |                                | <i>Dothiora</i>                     |
| <i>Candelaria concolor</i>      | <i>Bullera alba</i>            | <i>Aureobasidium</i>                |
|                                 | <i>Colacogloea falcata</i>     |                                     |
|                                 | <i>Pseudotremella</i>          |                                     |
| <i>Canoparmelia caroliniana</i> | <i>Curvibasidium nothofagi</i> | <i>Aureobasidium</i>                |
|                                 | <i>Leucosporidium</i>          | <i>Aureobasidium pullulans</i>      |
|                                 | <i>Oberwinklerozyma</i>        | <i>Dothiora</i>                     |
|                                 |                                | <i>Dothioraceae</i>                 |
|                                 |                                | <i>Plowrightia</i>                  |
| <i>Cladonia</i> spp.            | <i>Curvibasidium nothofagi</i> | <i>Aureobasidium</i>                |
|                                 |                                | <i>Exophiala</i>                    |
|                                 |                                | <i>Gibellulopsis nigrescens</i>     |
|                                 |                                | <i>Leotiomycetes incertae sedis</i> |
|                                 |                                | <i>Metapochonia</i>                 |
|                                 |                                | <i>Phialemonium</i>                 |
|                                 |                                | <i>Plectosphaerella</i>             |
|                                 |                                | <i>Thyridium</i>                    |
|                                 |                                | <i>Thyronectria austroamericana</i> |
| <i>Lecanora</i> sp.             | <i>Fibulobasidium</i>          |                                     |
|                                 | <i>Papiliotrema</i>            |                                     |
|                                 | <i>Tremella</i>                |                                     |
| <i>Parmotrema</i> sp.           | <i>Curvibasidium nothofagi</i> |                                     |
|                                 | <i>Kwoniella</i>               |                                     |
|                                 | <i>Sporobolomyces</i>          |                                     |
|                                 | <i>Tremella</i>                |                                     |
|                                 | <i>Trigonosporomyces</i>       |                                     |
|                                 | <i>Yunzhangia</i>              |                                     |
| <i>Physcia</i> sp.              | <i>Colacogloea</i>             | <i>Aureobasidium</i>                |
|                                 | <i>Kwoniella</i>               |                                     |
|                                 | <i>Rhodotorula</i>             |                                     |
| <i>Porpidia</i> sp.             | <i>Genolevuria</i>             | <i>Cyphellophora</i>                |
|                                 | <i>Libkindia</i>               | <i>Phialophora</i>                  |
|                                 | <i>Oberwinklerozyma</i>        |                                     |
|                                 | <i>Septobasidium</i>           |                                     |
| <i>Punctelia ulophylla</i>      | <i>Heterocephalacria</i>       | <i>Aureobasidium</i>                |
|                                 |                                | <i>Debaryomyces</i>                 |
|                                 |                                | <i>Dothiora</i>                     |
|                                 |                                | <i>Exophiala xenobiotica</i>        |
| <i>Rhizocarpon</i> sp.          | <i>Aureobasidium</i>           |                                     |
| <i>Rhizoplaca</i> sp.           | <i>Fibulobasidium</i>          |                                     |
| <i>Umbilicaria</i> sp.          |                                | <i>Aureobasidium</i>                |
| <i>Usnea</i> sp.                | <i>Curvibasidium nothofagi</i> | <i>Aureobasidium</i>                |
|                                 | <i>Kwoniella</i>               | <i>Plowrightia</i>                  |
|                                 | <i>Papiliotrema</i>            | <i>Lachancea</i>                    |
|                                 | <i>Saitozyma podzolica</i>     |                                     |
|                                 | <i>Sporobolomyces</i>          |                                     |
|                                 | <i>Tremella</i>                |                                     |
